# Supplementary material for: Nationwide statistical analysis of myeloid malignancies in Korea: incidence and survival rate from 1999 to 2012
Source: PubMed Central journal article supplement — Blood Res. 2015 Dec 21;50(4):204–17. doi: 10.5045/br.2015.50.4.204 (PMC4705046; doi:10.5045/br.2015.50.4.204), 2015-12-21
Supplement: br-50-204-s001.pdf [file br-50-204-s001.pdf]

**Supplementary Table 1.** Classification of myeloid malignancies (ICD-O-3).

| Site                                         | ICD-O-3 code | Description                                                       |
|----------------------------------------------|--------------|-------------------------------------------------------------------|
| Acute myeloid leukemia                       |              |                                                                   |
| Non-APL AML                                  | 9840         | Acute erythroid leukemia                                          |
|                                              | 9861         | AML, NOS                                                          |
|                                              | 9867         | Acute myelomonocytic leukemia                                     |
|                                              | 9870         | Acute basophilic leukemia                                         |
|                                              | 9872         | AML, minimal differentiation                                      |
|                                              | 9873         | AML without maturation                                            |
|                                              | 9874         | AML with maturation                                               |
|                                              | 9891         | Acute monocytic leukemia                                          |
|                                              | 9910         | Acute megakaryoblastic leukemia                                   |
|                                              | 9930         | Myeloid sarcoma                                                   |
|                                              | 9871         | AML with abnormal marrow eosinophils                              |
|                                              | 9896         | AML, t(8,21) (q22,q22)                                            |
|                                              | 9897         | AML, 11q23 abnormalities                                          |
|                                              | 9895         | AML, with multilineage dysplasia                                  |
|                                              | 9984         | Refractory anemia with excess blasts in transformation (obsolete) |
|                                              | 9931         | Acute panmyelosis with myelofibrosis                              |
|                                              | 9920         | Therapy-related myeloid neoplasms                                 |
| Acute promyelocytic leukemia                 | 9866         | Acute promyelocytic leukemia t(15; 17) (q22;q11-12)               |
| Myeloproliferative neoplasms                 |              |                                                                   |
| Chronic myelogenous leukemia                 | 9863         | CML, NOS                                                          |
|                                              | 9875         | Chronic myelogenous leukemia, BCR/ABL positive                    |
| Non-CML MPN                                  | 9950         | Polycythemia vera                                                 |
|                                              | 9961         | Myelosclerosis with myeloid metaplasia                            |
|                                              | 9962         | Essential thrombocythemia                                         |
|                                              | 9963         | Chronic neutrophilic leukemia                                     |
|                                              | 9964         | Hypereosinophilic syndrome                                        |
|                                              | 9960         | Chronic myeloproliferative disease, NOS                           |
|                                              | 9740         | Mast cell sarcoma                                                 |
|                                              | 9741         | Malignant mastocytosis                                            |
|                                              | 9742         | Mast cell leukemia                                                |
| Myelodysplastic syndrome                     | 9980         | Refractory anemia                                                 |
|                                              | 9982         | Refractory anemia with sideroblasts                               |
|                                              | 9983         | Refractory anemia with excess blasts                              |
|                                              | 9985         | Refractory cytopenia with multilineage dysplasia                  |
|                                              | 9986         | Myelodysplastic syndrome 5q deletion                              |
|                                              | 9987         | Therapy-related myelodysplastic syndrome, NOS                     |
|                                              | 9989         | Myelodysplastic syndrome, NOS                                     |
| Myelodysplastic/myeloproliferative neoplasms | 9945         | Chronic myelomonocytic leukemia                                   |
|                                              | 9876         | Atypical CML, BCR/ABL-1 negative                                  |
|                                              | 9946         | Juvenile myelomonocytic leukemia                                  |
|                                              | 9975         | Myelodysplastic/myeloproliferative neoplasm, unclassifiable       |
| Unknown myeloid neoplasms                    | 9800         | Leukemia, NOS                                                     |
|                                              | 9801         | Acute leukemia, NOS                                               |
|                                              | 9860         | Myeloid leukemia, NOS                                             |
|                                              | 9805         | Acute leukemia, ambiguous lineage                                 |

Abbreviation: NOS, not otherwise specified.
