# Supplementary material for: Nationwide statistical analysis of myeloid malignancies in Korea: incidence and survival rate from 1999 to 2012
Source: PubMed Central journal article supplement — Blood Res. 2015 Dec 21;50(4):204–17. doi: 10.5045/br.2015.50.4.204 (PMC4705046; doi:10.5045/br.2015.50.4.204), 2015-12-21
Supplement: br-50-204-s003.pdf [file br-50-204-s003.pdf]

**Supplementary Table 3.** Five-year relative survival rates of myeloid malignancies by age group in Korea (in detail).

| ICD-O-3 code                                                  | ICD-O-3 description                                               | Age (yr) | Year      |                   |           |                   |           |                   |           |                   |
|---------------------------------------------------------------|-------------------------------------------------------------------|----------|-----------|-------------------|-----------|-------------------|-----------|-------------------|-----------|-------------------|
|                                                               |                                                                   |          | 1996-2000 |                   | 2001-2005 |                   | 2006-2010 |                   | 2008-2012 |                   |
|                                                               |                                                                   |          | Cases     | Relative survival |
| <b>Acute myeloid leukemia: Non-APL AML</b>                    |                                                                   |          |           |                   |           |                   |           |                   |           |                   |
| 9840                                                          | Acute erythroid leukemia                                          | Total    | 3,452     | 23.7              | 4,297     | 27.4              | 4,686     | 29.8              | 4,810     | 30.5              |
| 9861                                                          | AML, NOS                                                          | 0-14     | 479       | 40.0              | 452       | 50.3              | 382       | 57.3              | 362       | 60.3              |
| 9867                                                          | Acute myelomonocytic leukemia                                     | 15-34    | 811       | 35.3              | 808       | 41.1              | 676       | 50.5              | 667       | 54.8              |
| 9870                                                          | Acute basophilic leukemia                                         | 35-49    | 823       | 26.5              | 1,010     | 35.8              | 978       | 43.3              | 931       | 42.4              |
| 9872                                                          | AML, minimal differentiation                                      | 50-64    | 812       | 11.7              | 1,046     | 17.3              | 1,158     | 26.7              | 1,218     | 30.4              |
| 9873                                                          | AML without maturation                                            | 65-79    | 485       | 4.3               | 880       | 6.5               | 1,287     | 6.7               | 1,379     | 7.3               |
| 9874                                                          | AML with maturation                                               | ≥80      | 42        | 0.0               | 101       | 7.1               | 205       | 0.8               | 253       | 0.0               |
| 9891                                                          | Acute monocytic leukemia                                          | -        | -         | -                 | -         | -                 | -         | -                 | -         | -                 |
| 9910                                                          | Acute megakaryoblastic leukemia                                   | -        | -         | -                 | -         | -                 | -         | -                 | -         | -                 |
| 9930                                                          | Myeloid sarcoma                                                   | -        | -         | -                 | -         | -                 | -         | -                 | -         | -                 |
| 9871                                                          | AML with abnormal marrow eosinophils                              | -        | -         | -                 | -         | -                 | -         | -                 | -         | -                 |
| 9896                                                          | AML, t(8,21) (q22,q22)                                            | -        | -         | -                 | -         | -                 | -         | -                 | -         | -                 |
| 9897                                                          | AML, 11q23 abnormalities                                          | -        | -         | -                 | -         | -                 | -         | -                 | -         | -                 |
| 9895                                                          | AML, with multilineage dysplasia                                  | Total    | 9         | 37.1              | 118       | 20.1              | 189       | 20.1              | 211       | 17.8              |
| 9984                                                          | Refractory anemia with excess blasts in transformation (obsolete) | 0-14     | 1         | 0.0               | 9         | 55.6              | 4         | 50.0              | 1         | 0.0               |
|                                                               |                                                                   | 15-34    | 4         | 50.3              | 15        | 20.1              | 19        | 40.7              | 11        | 0.0               |
|                                                               |                                                                   | 35-49    | 1         | 102.5             | 32        | 28.5              | 43        | 31.9              | 45        | 37.3              |
|                                                               |                                                                   | 50-64    | 1         | 0.0               | 39        | 13.4              | 69        | 17.9              | 76        | 14.1              |
|                                                               |                                                                   | 65-79    | 1         | 0.0               | 21        | 5.6               | 49        | 4.0               | 69        | 9.4               |
|                                                               |                                                                   | ≥80      | 1         | 0.0               | 2         | 0.0               | 5         | 0.0               | 9         | 0.0               |
| 9931                                                          | Acute panmyelosis with myelofibrosis                              | Total    | 15        | 46.2              | 38        | 24.9              | 57        | 20.4              | 66        | 13.9              |
| 9931                                                          | Acute panmyelosis with myelofibrosis                              | 0-14     | 0         | -                 | 3         | 0.0               | 5         | 0.0               | 3         | 0.0               |
|                                                               |                                                                   | 15-34    | 0         | -                 | 4         | 75.4              | 6         | 33.4              | 4         | 50.1              |
|                                                               |                                                                   | 35-49    | 1         | 0.0               | 2         | 101.0             | 7         | 29.0              | 8         | 0.0               |
|                                                               |                                                                   | 50-64    | 8         | 39.8              | 15        | 20.7              | 15        | 0.0               | 21        | 0.0               |
|                                                               |                                                                   | 65-79    | 5         | 47.4              | 12        | 9.5               | 23        | 34.1              | 29        | 13.3              |
|                                                               |                                                                   | ≥80      | 1         | 162.7             | 2         | 0.0               | 1         | 0.0               | 1         | 0.0               |
| <b>Acute myeloid leukemia: APL</b>                            |                                                                   |          |           |                   |           |                   |           |                   |           |                   |
| 9866                                                          | Acute promyelocytic leukemia t(15; 17) (q22;q11-12)               | Total    | 340       | 51.6              | 443       | 66.0              | 643       | 72.2              | 713       | 69.6              |
| 9866                                                          | Acute promyelocytic leukemia t(15; 17) (q22;q11-12)               | 0-14     | 36        | 66.8              | 35        | 62.9              | 40        | 90.1              | 44        | 86.2              |
|                                                               |                                                                   | 15-34    | 95        | 62.3              | 131       | 79.6              | 155       | 77.8              | 150       | 79.6              |
|                                                               |                                                                   | 35-49    | 116       | 52.4              | 167       | 64.7              | 213       | 75.8              | 237       | 74.9              |
|                                                               |                                                                   | 50-64    | 67        | 42.2              | 79        | 61.7              | 169       | 69.2              | 191       | 64.0              |
|                                                               |                                                                   | 65-79    | 23        | 10.4              | 31        | 28.5              | 64        | 44.8              | 87        | 41.1              |
|                                                               |                                                                   | ≥80      | 3         | 0.0               | 0         | -                 | 2         | 0.0               | 4         | 0.0               |
| <b>Myeloproliferative neoplasms: CML<sup>a)</sup></b>         |                                                                   |          |           |                   |           |                   |           |                   |           |                   |
| 9863                                                          | CML, NOS                                                          | Total    | -         | -                 | 980       | 74.5              | 1,844     | 83.7              | 2,016     | 85.5              |
| 9875                                                          | Chronic myelogenous leukemia, BCR/ABL positive                    | 0-14     | -         | -                 | 34        | 67.7              | 49        | 83.8              | 41        | 91.4              |
|                                                               |                                                                   | 15-34    | -         | -                 | 228       | 82.7              | 395       | 92.0              | 421       | 93.1              |
|                                                               |                                                                   | 35-49    | -         | -                 | 297       | 85.2              | 539       | 91.5              | 551       | 91.4              |
|                                                               |                                                                   | 50-64    | -         | -                 | 246       | 72.8              | 469       | 85.3              | 546       | 87.5              |
|                                                               |                                                                   | 65-79    | -         | -                 | 160       | 50.5              | 334       | 67.2              | 391       | 71.5              |
|                                                               |                                                                   | ≥80      | -         | -                 | 15        | 0                 | 58        | 16.8              | 66        | 20.3              |
| <b>Myeloproliferative neoplasms: Non-CML MPN<sup>a)</sup></b> |                                                                   |          |           |                   |           |                   |           |                   |           |                   |
| 9950                                                          | Polycythemia vera                                                 | Total    | -         | -                 | 396       | 95.5              | 942       | 98.4              | 1,015     | 99.7              |
| 9961                                                          | Myeloid metaplasia with myeloid metaplasia                        | Total    | -         | -                 | 124       | 53.4              | 338       | 52.9              | 378       | 54.6              |
| 9962                                                          | Essential thrombocythemia                                         | Total    | -         | -                 | 409       | 93.9              | 1,321     | 92.3              | 1,708     | 90.3              |
| 9963                                                          | Chronic neutrophilic leukemia                                     | Total    | -         | -                 | 12        | 54.5              | 13        | 65.3              | 12        | 34.2              |
| 9964                                                          | Hypereosinophilic syndrome                                        | Total    | -         | -                 | 81        | 96.6              | 298       | 94.1              | 300       | 95.6              |
| 9960                                                          | Chronic myeloproliferative disease, NOS                           | Total    | -         | -                 | 115       | 77.2              | 242       | 67.5              | 229       | 66.4              |

Supplementary Table 3. Continued.

| ICD-O-3 code                                               | ICD-O-3 description                                         | Age(yr) | Year      |                   |           |                   |           |                   |           |                   |
|------------------------------------------------------------|-------------------------------------------------------------|---------|-----------|-------------------|-----------|-------------------|-----------|-------------------|-----------|-------------------|
|                                                            |                                                             |         | 1996-2000 |                   | 2001-2005 |                   | 2006-2010 |                   | 2008-2012 |                   |
|                                                            |                                                             |         | Cases     | Relative survival |
| Myelodysplastic syndrome <sup>a)</sup>                     |                                                             |         |           |                   |           |                   |           |                   |           |                   |
| 9980                                                       | Refractory anemia                                           | Total   | -         | -                 | 193       | 60.1              | 318       | 60.8              | 292       | 65.0              |
| 9982                                                       | Refractory anemia with sideroblasts                         | -       | -         | -                 | -         | -                 | -         | -                 | -         | -                 |
| 9983                                                       | Refractory anemia with excess blasts                        | Total   | -         | -                 | 226       | 23.7              | 646       | 20.4              | 809       | 24.3              |
| 9985                                                       | Refractory cytopenia with multilineage dysplasia            | Total   | -         | -                 | 108       | 63.5              | 501       | 52.9              | 706       | 54.4              |
| 9986                                                       | Myelodysplastic syndrome 5q deletion                        | Total   | -         | -                 | 5         | 82.8              | 15        | 40.7              | 21        | 68.1              |
| Myelodysplastic/myeloproliferative neoplasms <sup>a)</sup> |                                                             |         |           |                   |           |                   |           |                   |           |                   |
| 9945                                                       | Chronic myelomonocytic leukemia                             | Total   | -         | -                 | 69        | 21.3              | 139       | 23.3              | 195       | 23.2              |
| 9876                                                       | Atypical CML, BCR/ABL-1 negative                            | Total   | -         | -                 | 3         | 34.9              | 23        | 14.2              | 45        | 0.0               |
| 9946                                                       | Juvenile myelomonocytic leukemia                            | Total   | -         | -                 | 16        | 50.2              | 34        | 65.0              | 41        | 70.4              |
| 9975                                                       | Myelodysplastic/myeloproliferative neoplasm, unclassifiable | Total   | -         | -                 | 0         | -                 | 1         | 0.0               | 9         | 0.0               |
| Unknown myeloid neoplasms                                  |                                                             |         |           |                   |           |                   |           |                   |           |                   |
| 9800                                                       | Leukemia, NOS                                               | Total   | 1,094     | 22.6              | 1,217     | 29.4              | 1,146     | 39.9              | 1,143     | 41.6              |
| 9801                                                       | Acute leukemia, NOS                                         | 0-14    | 119       | 45.5              | 85        | 55.4              | 61        | 65.7              | 56        | 73.3              |
|                                                            |                                                             | 15-34   | 170       | 29.6              | 125       | 37.7              | 105       | 56.4              | 88        | 61.2              |
|                                                            |                                                             | 35-49   | 148       | 27.5              | 141       | 46.0              | 140       | 66.1              | 132       | 64.8              |
|                                                            |                                                             | 50-64   | 267       | 21.3              | 252       | 34.9              | 220       | 51.7              | 207       | 57.3              |
|                                                            |                                                             | 65-79   | 332       | 10.2              | 479       | 19.3              | 433       | 27.3              | 454       | 30.5              |
|                                                            |                                                             | ≥80     | 58        | 12.8              | 135       | 9.0               | 187       | 12.5              | 206       | 11.4              |
|                                                            |                                                             | Total   | 81        | 26.1              | 59        | 26.7              | 75        | 37.9              | 94        | 38.5              |
| 9860                                                       | Myeloid leukemia, NOS                                       | 0-14    | 13        | 30.8              | 3         | 66.8              | 3         | 100.1             | 4         | 0.0               |
|                                                            |                                                             | 15-34   | 14        | 21.6              | 9         | 33.4              | 7         | 28.6              | 5         | 40.1              |
|                                                            |                                                             | 35-49   | 12        | 50.7              | 7         | 57.9              | 14        | 64.9              | 21        | 66.8              |
|                                                            |                                                             | 50-64   | 23        | 18.6              | 19        | 27.4              | 17        | 54.6              | 16        | 57.3              |
|                                                            |                                                             | 65-79   | 19        | 19.7              | 20        | 5.7               | 24        | 14.8              | 31        | 0.0               |
|                                                            |                                                             | ≥80     | 0         | -                 | 1         | 0.0               | 10        | 0.0               | 17        | 0.0               |
|                                                            |                                                             | Total   | 5         | 40.3              | 105       | 34.5              | 138       | 37.8              | 120       | 40.5              |
| 9805                                                       | Acute leukemia, ambiguous lineage                           | Total   | 5         | 40.3              | 105       | 34.5              | 138       | 37.8              | 120       | 40.5              |
| All myeloid malignancies <sup>b)</sup>                     |                                                             |         |           |                   |           |                   |           |                   |           |                   |
|                                                            |                                                             | Total   | 4,996     | 25.5              | 9,515     | 43.5              | 14,996    | 53.6              | 16,544    | 55.1              |
|                                                            |                                                             | 0-14    | 649       | 42.3              | 729       | 54.1              | 712       | 66.1              | 682       | 69.6              |
|                                                            |                                                             | 15-34   | 1,096     | 36.7              | 1,558     | 55.3              | 1,865     | 70.4              | 1,883     | 73.7              |
|                                                            |                                                             | 35-49   | 1,102     | 29.6              | 2,136     | 55.0              | 3,075     | 68.9              | 3,149     | 69.8              |
|                                                            |                                                             | 50-64   | 1,179     | 15.9              | 2,417     | 41.8              | 3,863     | 57.1              | 4,334     | 60.2              |
|                                                            |                                                             | 65-79   | 865       | 7.3               | 2,320     | 26.1              | 4,656     | 36.2              | 5,375     | 38.4              |
|                                                            |                                                             | ≥80     | 105       | 8.7               | 355       | 16.3              | 825       | 19.3              | 1,121     | 21.6              |

<sup>a)</sup>Official registration employing ICD-O-3 began in 2003 at KCCR, <sup>b)</sup>ICD-O-3 codes 9920, 9740, 9741, 9742, 9987, and 9989 were included in all myeloid malignancies.

Abbreviations: same as in Supplementary Table 2.
